# Supplementary material
Source: PubMed Central journal article supplement (PMC6645221)
Supplement: ao8b01333_si_001.pdf [file ao8b01333_si_001.pdf]

# **Solar Driven One-Compartment Hydrogen Peroxide-Photofuel Cell Using Bismuth Vanadate Photoanode**

**Tatsuhiko Onishi, Musashi Fujishima, and Hiroaki Tada\***

*Graduate School of Science and Engineering, Kindai University, 3-4-1, Kowakae,  
Higashi-Osaka, Osaka 577-8502, Japan.*

\* To whom correspondence should be addressed: TEL: +81-6-6721-2332, FAX: +81-6-6727-2024,

E-mail: [h-tada@apch.kindai.ac.jp](mailto:h-tada@apch.kindai.ac.jp).

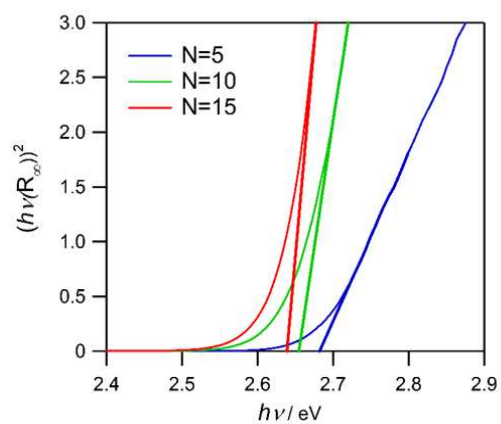

**Figure S1.** Tauc plots for *ms*-BiVO<sub>4</sub>/FTO with varying *N*.

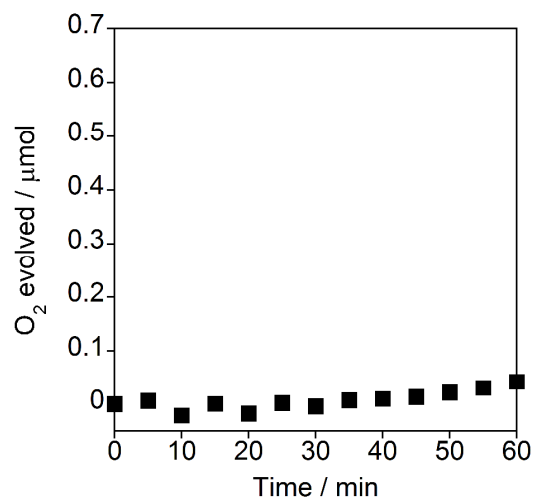

**Figure S2.** Time courses for O<sub>2</sub> generation from water in the presence of *ms*-BiVO<sub>4</sub> particles under illumination of simulated sunlight (AM 1.5, 19 mW cm<sup>-2</sup>).

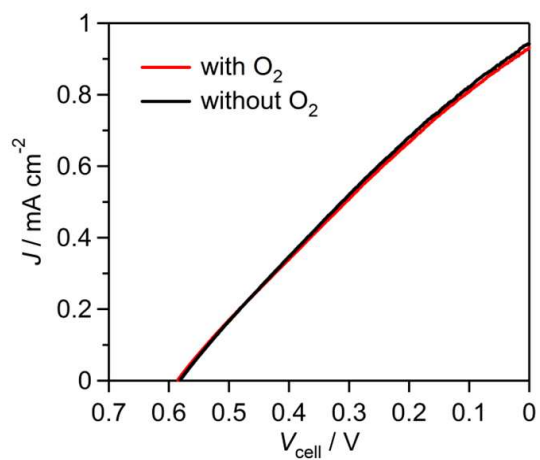

**Figure S3.** (A)  $J$ - $V_{\text{cell}}$  curves for the two-electrode cell with the structure of  $\text{BiVO}_4/\text{FTO}$  photoanode | deaerated (black) and aerated (red) electrolyte solutions of 0.1 M  $\text{NaClO}_4$  with 0.1 M  $\text{H}_2\text{O}_2$  (pH 3) |  $\text{PB}/\text{FTO}$  cathode under the illumination of simulated solar light (AM 1.5,  $100 \text{ mW cm}^{-2}$ , one sun).

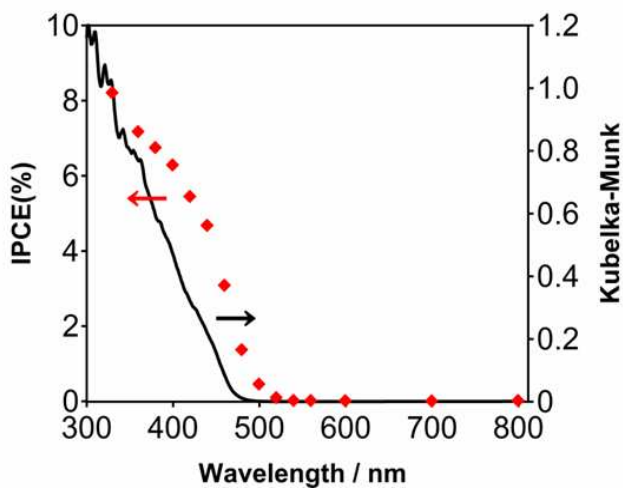

**Figure S4.** IPCE action spectrum for the two-electrode cell with the structure of  $\text{BiVO}_4/\text{FTO}$  photoanode ( $N = 10$ ) | deaerated electrolyte solution of 0.1 M  $\text{NaClO}_4$  with 0.1 M  $\text{H}_2\text{O}_2$  (pH 3) |  $\text{PB}/\text{FTO}$  cathode under the illumination of simulated solar light (AM 1.5,  $100 \text{ mW cm}^{-2}$ , one sun).
